# Supplementary material for: Disability weights for the burden of oral disease in South Australia
Source: Springer Nature journal article supplement (doi:10.1186/1478-7954-2-7), 2004-09-03
Supplement: Additional file 1 [file 1478-7954-2-7-s1.pdf]

## Appendix 1: algorithm used to calculate disability weights from the additive model

The algorithm used for the unadjusted disability weight ( $DW_a$ ) was as follows:

$$DW_a = 0.081 + (0.069 \times MO) + (0.104 \times SC) + (0.036 \times UA) + (0.123 \times PD) + (0.071 \times AD) \\ + (0.176 \times M2) + (0.006 \times S2) + (0.022 \times U2) + (0.140 \times P2) + (0.094 \times A2) \\ + (0.269 \times N3)$$

The algorithm for the disability weight adjusted by percentage of time affected ( $DW_b$ ) was as follows:

$$DW_b = 0.081 + (0.069 \times MO \times P_1) + (0.104 \times SC \times P_2) + (0.036 \times UA \times P_3) + (0.123 \times PD \times P_4) + (0.071 \times AD \times P_5) \\ + (0.176 \times M2 \times P_1) + (0.006 \times S2 \times P_2) + (0.022 \times U2 \times P_3) + (0.140 \times P2 \times P_4) + (0.094 \times A2 \times P_5) \\ + (0.269 \times N3)$$

where  $P_1$  to  $P_5$  is percentage of time experiencing symptoms in relation to that dimension

The algorithm for the disability weight adjusted by the constant ( $DW_c$ ) was as follows:

$$DW_c = DW_b - 0.081$$

### Coding of variables in disability weight algorithms – additive model

| Variable | Definition                                                                                                                                                |
|----------|-----------------------------------------------------------------------------------------------------------------------------------------------------------|
| Constant | Constant (=0.081): associated with any move away from full health                                                                                         |
| MO       | MO=1 if mobility is level 2 (some/moderate problem);<br>MO=2 if mobility is level 3 (extreme problem);<br>MO=0 otherwise (no problem)                     |
| SC       | SC=1 if self-care is level 2 (some/moderate problem);<br>SC=2 if self-care is level 3 (extreme problem);<br>SC=0 otherwise (no problem)                   |
| UA       | UA=1 if usual activities is level 2 (some/moderate problem);<br>UA=2 if usual activities is level 3 (extreme problem);<br>UA=0 otherwise (no problem)     |
| PD       | PD=1 if pain/discomfort is level 2 (some/moderate problem);<br>PD=2 if pain/discomfort is level 3 (extreme problem);<br>PD=0 otherwise (no problem)       |
| AD       | AD=1 if anxiety/depression is level 2 (some/moderate problem);<br>AD=2 if anxiety/depression is level 3 (extreme problem);<br>AD=0 otherwise (no problem) |
| M2       | M2=1 if mobility is level 3 (extreme problem);<br>M2=0 otherwise                                                                                          |
| S2       | S2=1 if self-care is level 3 (extreme problem);<br>S2=0 otherwise                                                                                         |
| U2       | U2=1 if usual activities is level 3 (extreme problem);<br>U2=0 otherwise                                                                                  |
| P2       | P2=1 if pain/discomfort is level 3 (extreme problem);<br>P2=0 otherwise                                                                                   |
| A2       | A2=1 if anxiety/depression is level 3 (extreme problem);<br>A2=0 otherwise                                                                                |
| N3       | N3=1 if any dimension is level 3 (extreme problem);<br>else N3=0                                                                                          |

## Appendix 2: algorithm used to calculate disability weights from the multiplicative model

The algorithm used for the unadjusted disability weight ( $DW_d$ ) was as follows:

$$\begin{aligned} \log(w) = & 0 + (-0.247 \times d_{12}) + (-0.5419 \times d_{13}) + (-0.12455 \times d_{22}) + (-0.5718 \times d_{23}) \\ & + (0.000 \times d_{32}) + (-0.2051 \times d_{33}) + (-0.0576 \times d_{42}) + (-0.5039 \times d_{43}) \\ & + (-0.2284 \times d_{52}) + (-0.742 \times d_{53}) + (-0.1915 \times d_{62}) + (-0.5636 \times d_{63}) \\ & + (-0.01 \times s) + (-0.1228 \times p) \\ DW_d = & 1 - e^{\log(w)} \end{aligned}$$

The algorithm for the disability weight adjusted by percentage of time affected ( $DW_e$ ) was as follows:

$$\begin{aligned} \log(w) = & 0 + (-0.247 \times d_{12} \times P_1) + (-0.5419 \times d_{13} \times P_1) + (-0.12455 \times d_{22} \times P_2) + (-0.5718 \times d_{23} \times P_2) \\ & + (0.000 \times d_{32} \times P_3) + (-0.2051 \times d_{33} \times P_3) + (-0.0576 \times d_{42} \times P_4) + (-0.5039 \times d_{43} \times P_4) \\ & + (-0.2284 \times d_{52} \times P_5) + (-0.742 \times d_{53} \times P_5) + (-0.1915 \times d_{62} \times P_6) + (-0.5636 \times d_{63} \times P_6) \\ & + (-0.01 \times s) + (-0.1228 \times p) \\ DW_e = & 1 - e^{\log(w)} \end{aligned}$$

where  $P_1$  to  $P_6$  is percentage of time experiencing symptoms in relation to that dimension and  $e$  is the base of the natural logarithm

### Coding of variables in disability weight algorithms – multiplicative model

| Variable | Definition                                                                                   |
|----------|----------------------------------------------------------------------------------------------|
| $d_{12}$ | $d_{12}=1$ if mobility is level 2 (some/moderate problem);<br>$d_{12}=0$ otherwise           |
| $d_{13}$ | $d_{13}=1$ if mobility is level 3 (extreme problem);<br>$d_{13}=0$ otherwise                 |
| $d_{22}$ | $d_{22}=1$ if self-care is level 2 (some/moderate problem);<br>$d_{22}=0$ otherwise          |
| $d_{23}$ | $d_{23}=1$ if self-care is level 3 (extreme problem);<br>$d_{23}=0$ otherwise                |
| $d_{32}$ | $d_{32}=1$ if usual activities is level 2 (some/moderate problem);<br>$d_{32}=0$ otherwise   |
| $d_{33}$ | $d_{33}=1$ if usual activities is level 3 (extreme problem);<br>$d_{33}=0$ otherwise         |
| $d_{42}$ | $d_{42}=1$ if pain/discomfort is level 2 (some/moderate problem);<br>$d_{42}=0$ otherwise    |
| $d_{43}$ | $d_{43}=1$ if pain/discomfort is level 3 (extreme problem);<br>$d_{43}=0$ otherwise          |
| $d_{52}$ | $d_{52}=1$ if anxiety/depression is level 2 (some/moderate problem);<br>$d_{52}=0$ otherwise |
| $d_{53}$ | $d_{53}=1$ if anxiety/depression is level 3 (extreme problem);<br>$d_{53}=0$ otherwise       |
| $d_{62}$ | $d_{62}=1$ if cognition is level 2 (some/moderate problem);<br>$d_{62}=0$ otherwise          |
| $d_{63}$ | $d_{63}=1$ if cognition is level 3 (extreme problem);<br>$d_{63}=0$ otherwise                |
| $s$      | $s=1$ if all dimensions are level 1 (no problem) but disease present;<br>else $s=0$          |
| $p$      | $p=1$ if prognosis is uncertain;<br>else $p=0$                                               |
